# Supplementary material for: Pleurotus eryngii Genomes Reveal Evolution and Adaptation to the Gobi Desert Environment
Source: Front Microbiol. 2019 Sep 3;10:2024. doi: 10.3389/fmicb.2019.02024 (PMC6734163; doi:10.3389/fmicb.2019.02024)
Supplement: TABLE S1 — Information of Pleurotus eryngii and P. tuoliensis strains used for whole genome resequencing. [file Table_1.XLSX]

## Sheet: Sheet1
Table S1. Information of Pleurotus eryngii and P. tuoliensis strains used for whole genome resequencing.
Strain Number	Strain Name	Strain Type	Origin
CCMJ970	P. eryngii var. ferulae	Wild strain	China
CCMJ971	P. eryngii var. ferulae	Wild strain	China
CCMJ989	P. eryngii var. ferulae	Wild strain	China
CCMJ972	P. eryngii var. ferulae	Wild strain	China
CCMJ984	P. eryngii var. ferulae	Wild strain	China
CCMJ985	P. eryngii var. ferulae	Wild strain	China
CCMJ986	P. eryngii var. ferulae	Wild strain	China
CCMJ990	P. eryngii var. ferulae	Wild strain	China
CCMJ991	P. eryngii var. ferulae	Wild strain	China
CCMJ992	P. eryngii var. ferulae	Wild strain	China
CCMJ993	P. eryngii var. ferulae	Wild strain	China
CCMJ1174	P. eryngii var. ferulae	Wild strain	China
CCMJ1680	P. eryngii var. ferulae	Wild strain	China
CCMJ1681	P. eryngii var. ferulae	Wild strain	China
CCMJ1130	P. eryngii var. eryngii	Cultivated strain	Japan
CCMJ656	P. eryngii var. eryngii	Cultivated strain	China
CCMJ1725	P. eryngii var. eryngii	Cultivated strain	China
CCMJ1066	P. eryngii var. eryngii	Cultivated strain	China
CCMJ657	P. eryngii var. eryngii	Cultivated strain	China
CCMJ1072	P. eryngii var. eryngii	Cultivated strain	China
CCMJ645	P. eryngii var. eryngii	Cultivated strain	China
CCMJ1683	P. eryngii var. eryngii	Cultivated strain	China
CCMJ1731	P. eryngii var. eryngii	Cultivated strain	China
CCMJ1693	P. eryngii var. eryngii	Cultivated strain	China
CCMJ1049	P. eryngii var. eryngii	Cultivated strain	China
CCMJ1102	P. eryngii var. eryngii	Cultivated strain	China
CCMJ1707	P. eryngii var. eryngii	Cultivated strain	China
CCMJ655	P. eryngii var. eryngii	Cultivated strain	China
CCMJ1691	P. eryngii var. eryngii	Cultivated strain	China
CCMJ1699	P. eryngii var. eryngii	Cultivated strain	China
CCMJ1730	P. eryngii var. eryngii	Cultivated strain	China
CCMJ1058	P. eryngii var. eryngii	Cultivated strain	China
CCMJ2132	P. eryngii var. eryngii	Wild strain	Europe
CCMJ814	P. tuoliensis	Wild strain	China
CCMJ1157	P. tuoliensis	Cultivated strain	China
CCMJ1164	P. tuoliensis	Wild strain	China
CCMJ1676	P. tuoliensis	Cultivated strain	China
